# Supplementary material for: Light‐dependent N‐terminal phosphorylation of LHCSR3 and LHCB4 are interlinked in Chlamydomonas reinhardtii
Source: PubMed Central journal article supplement (PMC6851877; doi:10.1111/tpj.14368), 2019-05-30
Supplement: TPJ-99-877-s001.pdf [file TPJ-99-877-s001.pdf]

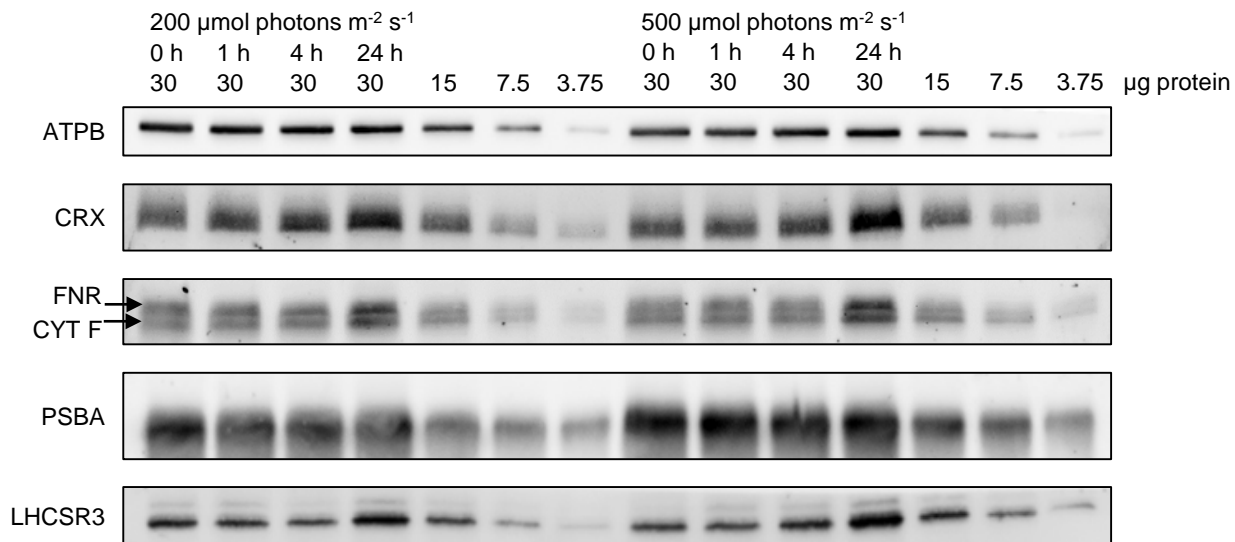

**Figure S1.** Western Blot analysis of whole cell extracts from cultures exposed to 200  $\mu\text{mol photons m}^{-2} \text{s}^{-1}$  or 500  $\mu\text{mol photons m}^{-2} \text{s}^{-1}$  high light. Samples were taken after 0 h, 1 h, 4 h and 24 h. For SDS-PAGE, whole cell samples were adjusted to equal protein amounts.
