# Supplementary material for: Light‐dependent N‐terminal phosphorylation of LHCSR3 and LHCB4 are interlinked in Chlamydomonas reinhardtii
Source: PubMed Central journal article supplement (PMC6851877; doi:10.1111/tpj.14368), 2019-05-30
Supplement: TPJ-99-877-s002.pdf [file TPJ-99-877-s002.pdf]

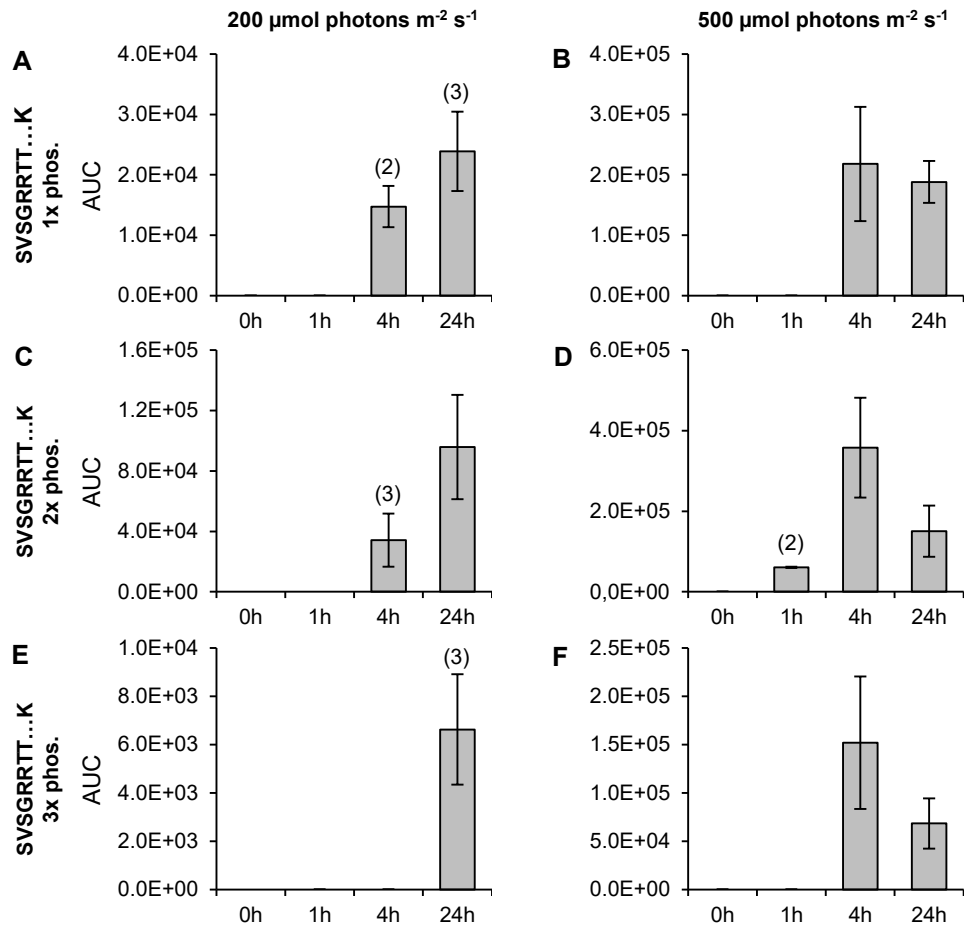

**Figure S2.** Changes in the abundance of singly and multiply phosphorylated variants of the LHCSR3 peptide  $S_{26}VS_{28}GRRT_{32}T_{33}AAEPQTAAPVAAEDVFAYTK$  in response to different light conditions.

Algal cultures were exposed to 200  $\mu\text{mol photons m}^{-2} \text{s}^{-1}$  (A, C, E) or 500  $\mu\text{mol photons m}^{-2} \text{s}^{-1}$  (B, D, F) high light in HS medium and samples were taken at the indicated timepoints. Label-free quantification was performed as described in Figure 1.

(A, B) Singly phosphorylated peptide  $S_{26}VS_{28}GRRT_{32}T_{33}AAEPQTAAPVAAEDVFAYTK$   
(C, D) Same peptide as in (A,B), doubly phosphorylated.

(E, F) Same peptide as in (A,B), triply phosphorylated.

Data represent mean  $\pm$  standard deviation (200  $\mu\text{mol photons m}^{-2} \text{s}^{-1}$ :  $n=4$ ; 500  $\mu\text{mol photons m}^{-2} \text{s}^{-1}$ :  $n=3$  (0h:  $n=2$ )). Numbers in parentheses indicate the number of data points if low abundances did not permit quantification in all replicates. Welch's t-test (unpaired, two-tailed) was used to analyse the data: Values labelled with identical letters, or no letters, don't show statistically significant differences ( $p > 0.05$ ).

Only kinetics of protein abundance changes but not absolute protein or peptide levels are comparable between the two high light experiments, since samples were analysed with different LC-MS configurations.
