# Supplementary material for: Light‐dependent N‐terminal phosphorylation of LHCSR3 and LHCB4 are interlinked in Chlamydomonas reinhardtii
Source: PubMed Central journal article supplement (PMC6851877; doi:10.1111/tpj.14368), 2019-05-30
Supplement: TPJ-99-877-s004.pdf [file TPJ-99-877-s004.pdf]

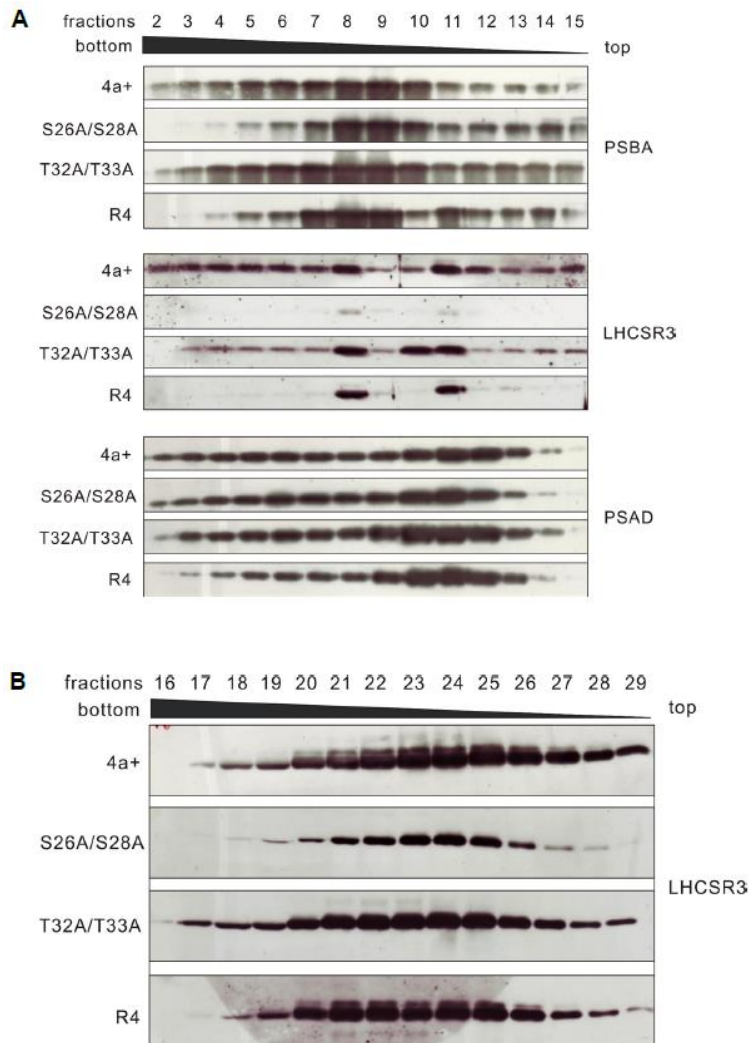

**Figure S4.** Immunoblot analysis of the distribution of PSII, PSI and LHCSR3 across sucrose density gradients.

Thylakoid membranes were isolated from wild type 4a+ and strains expressing LHCSR3 with altered N-terminal phosphosites (S26A/S28A, T32A/T33A) or wild typical LHCSR3 (R4) under the control of the constitutively active PSAD promoter. Prior to the thylakoid isolation, strains were grown in autotrophic conditions at  $200 \mu\text{mol photons m}^{-2} \text{s}^{-1}$  for 24 h. After solubilization by 1 % n-dodecyl- $\alpha$ -D-maltoside and separation on sucrose density gradients, gradients were separated into 29 fractions, beginning with high sucrose density fractions at the bottom. Fractions were further analyzed by SDS-PAGE and Immunoblot. Samples for SDS-PAGE were adjusted to the equal volume.

**(A)** Fractions 2-15, analyzed using antibodies targeting PSII subunit PSBA, PSI subunit PSAD and LHCSR3.

**(B)** Fractions 16-29 analyzed using antibodies targeting LHCSR3.
