# Supplementary material for: Light‐dependent N‐terminal phosphorylation of LHCSR3 and LHCB4 are interlinked in Chlamydomonas reinhardtii
Source: PubMed Central journal article supplement (PMC6851877; doi:10.1111/tpj.14368), 2019-05-30
Supplement: TPJ-99-877-s006.pdf [file TPJ-99-877-s006.pdf]

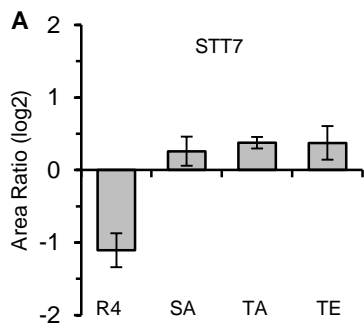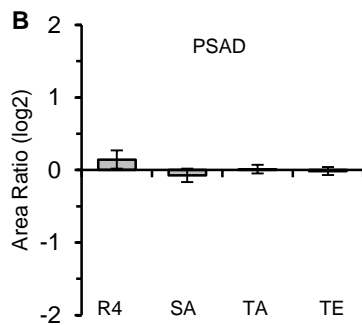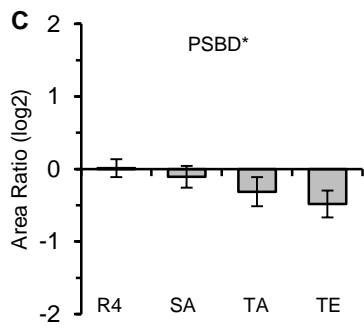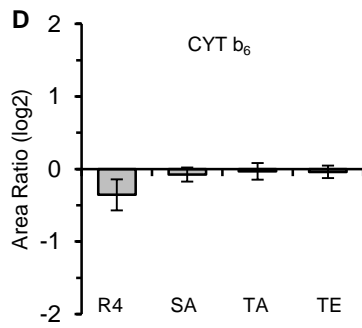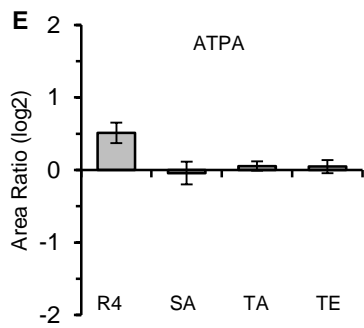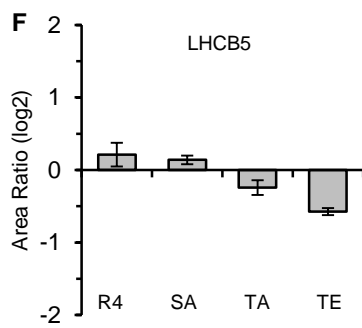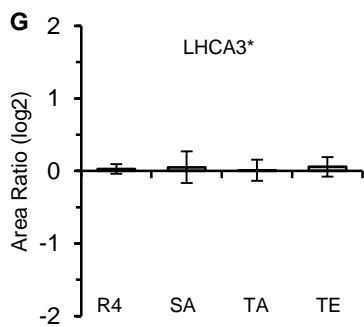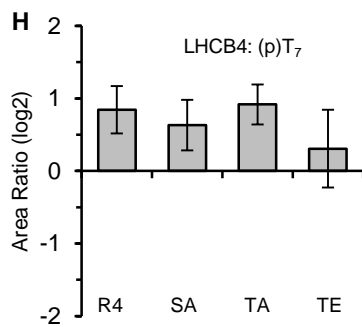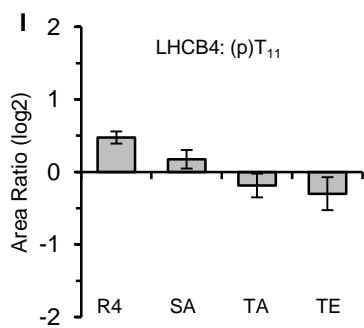

**Figure S6.** Changes in relative protein/peptide abundances and phosphorylation levels in LHCSR3 mutant and rescued strains.

For details regarding experimental conditions and quantification see **Fig. 6**. R4, LHCSR3-R4; SA, LHCSR3-S26A/S28A; TA, LHCSR3-T32A/T33A; TE, LHCSR3-T32E/T33E; \*, quantified only in samples treated with trypsin; (p), phosphorylated residue.

**(A)** STT7 **(B)** Photosystem I reaction center subunit II (PSAD) **(C)** Photosystem II D2 protein (PSBD) **(D)** Cytochrome  $b_6$  **(E)** CF1 ATPase beta-subunit (ATPB) **(F)** LHCB5 **(G)** LHCA3 **(H)** Singly LHCB4 peptide FP(p) $T_7$ PPG $T_{11}$ QK. **(I)** Singly LHCB4 peptide FPT $_7$ PPG(p) $T_{11}$ QK.
