# Supplementary material for: Light‐dependent N‐terminal phosphorylation of LHCSR3 and LHCB4 are interlinked in Chlamydomonas reinhardtii
Source: PubMed Central journal article supplement (PMC6851877; doi:10.1111/tpj.14368), 2019-05-30
Supplement: TPJ-99-877-s008.pdf [file TPJ-99-877-s008.pdf]

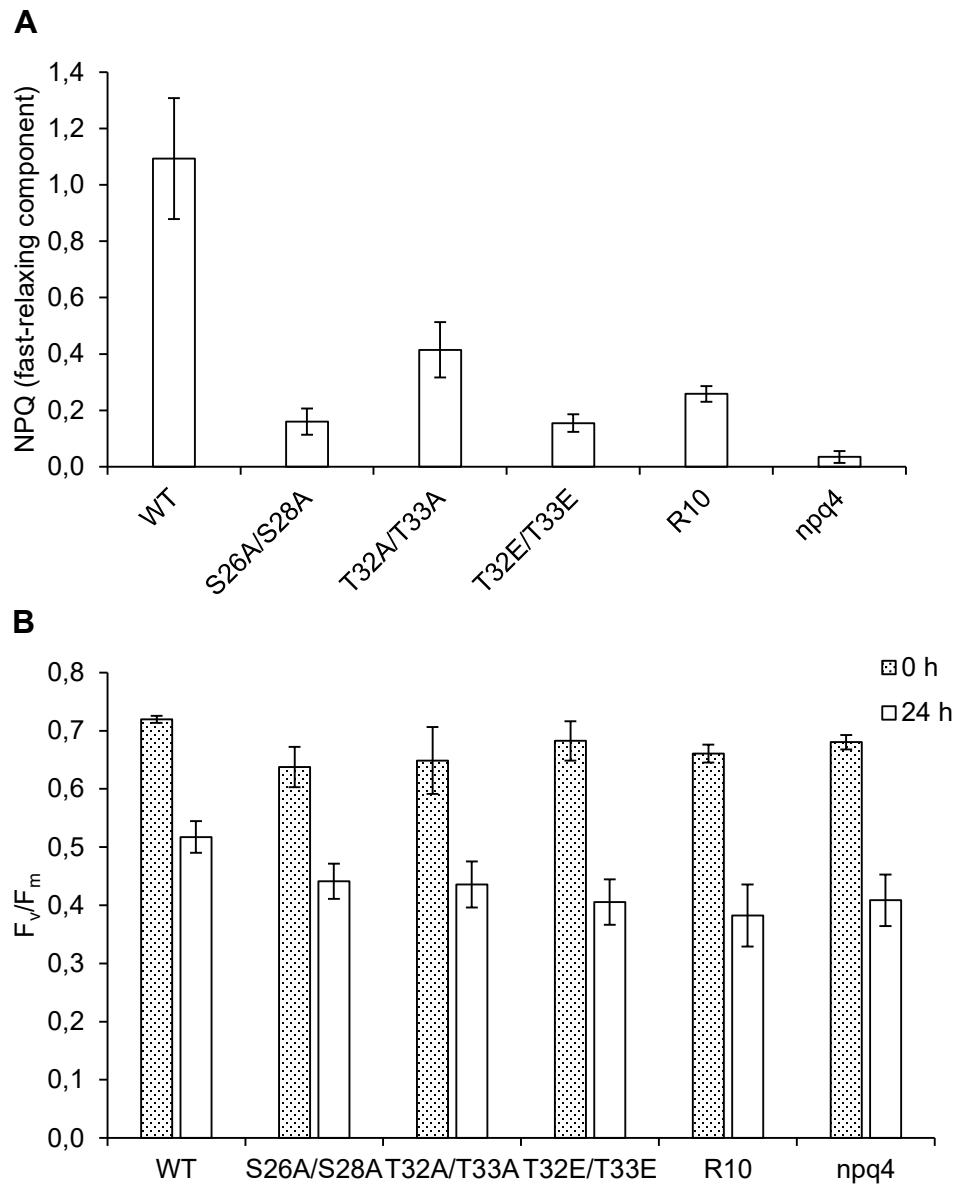

**Figure S8.** qE-dependent NPQ and maximum quantum yield in WT, S26A/S28A, T32A/T33A, T32E/T33E, R10 (equivalent to R4) and npq4

NPQ was measured after 24 h at  $200 \mu\text{mol photons m}^{-2} \text{s}^{-1}$  (A). The maximum quantum yield ( $F_v/F_m$ ) was measured prior to and following 24 h at  $200 \mu\text{mol photons m}^{-2} \text{s}^{-1}$  (B). Prior to the high light exposure, cultures were shifted to HSM and adjusted to  $8 \mu\text{g mL}^{-1}$  chlorophyll. Before the measurements, cells were dark adapted for at least 10 min. The amplitude of the fast-relaxing NPQ component was assessed within the first 30 s of darkness following 3.5 min at  $800 \mu\text{mol photons m}^{-2} \text{s}^{-1}$ . Data points represent means  $\pm$  SEM of 3 biological replicates.
