# Supplementary material for: Light‐dependent N‐terminal phosphorylation of LHCSR3 and LHCB4 are interlinked in Chlamydomonas reinhardtii
Source: PubMed Central journal article supplement (PMC6851877; doi:10.1111/tpj.14368), 2019-05-30
Supplement: TPJ-99-877-s009.pdf [file TPJ-99-877-s009.pdf]

# Table S1

**Table S1.** Observed phosphopeptides of LHCSR3 (wildtype and mutant versions).

Peptide identification and determination of phosphorylation sites were performed using MaxQuant. PEP, posterior error probability.

| Protein            | Positions within Protein | Localization Probability | PEP       | Score for Localization | Number of Phospho | Amino Acid | Phospho Site Probabilities                                      |
|--------------------|--------------------------|--------------------------|-----------|------------------------|-------------------|------------|-----------------------------------------------------------------|
| LHCSR3             | 26                       | 0.84                     | 2.83E-65  | 129.5                  | 2;3               | S          | S(0.836)VS(0.623)GRRT(0.411)T(0.129)AAEPQTAAPVAAEDVFAYTK        |
| LHCSR3             | 28                       | 0.72                     | 5.27E-65  | 54.441                 | 2;3               | S          | S(0.763)VS(0.717)GRRT(0.686)T(0.686)AAEPQT(0.149)AAPVAAEDVFAYTK |
| LHCSR3             | 32                       | 0.69                     | 1.13E-135 | 54.441                 | 1;2;3             | T          | S(0.763)VS(0.717)GRRT(0.686)T(0.686)AAEPQT(0.149)AAPVAAEDVFAYTK |
| LHCSR3             | 33                       | 0.94                     | 2.72E-264 | 202.2                  | 1;2;3             | T          | RT(0.059)T(0.941)AAEPQTAAPVAAEDVFAYTK                           |
| LHCSR3             | 39                       | 0.33                     | 3.70E-3   | 40.381                 | 1                 | T          | T(0.333)T(0.333)AAEPQT(0.333)AAPVAAEDVFAYTK                     |
| LHCSR3 (T32E/T33E) | 28                       | 0.53                     | 1.4E-12   | 112.15                 | 1                 | S          | S(0.466)VS(0.533)GRR <b>E</b> AAEPQTAAPVAAEDVFAYTK              |
| LHCSR3 (T32A/T33A) | 26                       | 0.80                     | 1.9E-67   | 87.203                 | 1                 | S          | S(0.801)VS(0.195)GRR <b>A</b> AAEPQT(0.004)AAPVAAEDVFAYTK       |
| LHCSR3 (T32A/T33A) | 28                       | 0.44                     | 6.5E-13   | 54.703                 | 1                 | S          | S(0.441)VS(0.441)GRR <b>A</b> AAEPQT(0.119)AAPVAAEDVFAYTK       |
