# Supplementary material for: Light‐dependent N‐terminal phosphorylation of LHCSR3 and LHCB4 are interlinked in Chlamydomonas reinhardtii
Source: PubMed Central journal article supplement (PMC6851877; doi:10.1111/tpj.14368), 2019-05-30
Supplement: TPJ-99-877-s010.pdf [file TPJ-99-877-s010.pdf]

# Table S2

**Table S2.** LC-MS/MS parameters for DDA analyses (for generation of spectral libraries and quantification by MS1 feature detection (MaxLFQ)).

|                                                  | LHCSR3 phosphosite mutants                                                                                                                                                                                            |          |                       |          | High light kinetics                                                                                |          |                                                                                                    |          |
|--------------------------------------------------|-----------------------------------------------------------------------------------------------------------------------------------------------------------------------------------------------------------------------|----------|-----------------------|----------|----------------------------------------------------------------------------------------------------|----------|----------------------------------------------------------------------------------------------------|----------|
|                                                  | Trypsin digested samples                                                                                                                                                                                              |          | LysC digested samples |          | 200 $\mu\text{mol photons m}^{-2} \text{s}^{-1}$                                                   |          | 500 $\mu\text{mol photons m}^{-2} \text{s}^{-1}$                                                   |          |
|                                                  | non-enriched                                                                                                                                                                                                          | enriched | non-enriched          | enriched | non-enriched                                                                                       | enriched | non-enriched                                                                                       | enriched |
| <b>Eluent compositions</b>                       | Peptide trapping: 0.05% trifluoroacetic acid (TFA) in ultrapure water (A1), 0.05% TFA in 80% acetonitrile (B1)<br>Peptide separation: 0.1% formic acid (FA) in ultrapure water (A2), 0.1% FA in 80% acetonitrile (B2) |          |                       |          |                                                                                                    |          |                                                                                                    |          |
| <b>Trap Column</b>                               | C18 PepMap 100, 300 $\mu\text{m}$ x 5 mm, 5 $\mu\text{m}$ particle size, 100 $\text{\AA}$ pore size; Thermo Scientific                                                                                                |          |                       |          |                                                                                                    |          |                                                                                                    |          |
| <b>Peptide trapping (eluent A1+B1)</b>           | 2.5% B1 at 10 $\mu\text{l/min}$ for 10 min                                                                                                                                                                            |          |                       |          | 2.5% B1 at 10 $\mu\text{l/min}$ for 5 min                                                          |          |                                                                                                    |          |
| <b>Flow rate</b>                                 | 300 nl/min                                                                                                                                                                                                            |          |                       |          |                                                                                                    |          |                                                                                                    |          |
| <b>Gradient for peptide separation</b>           | 2.5-30% B2 over 240 min,<br>30-50% B2 over 60 min,<br>50%-99% B2 over 5 min<br>99% B2 over 15 min                                                                                                                     |          |                       |          | 2.5-18% B2 over 105 min,<br>18%-32% B2 over 55 min,<br>32%-99% B2 over 5 min,<br>99% B over 20 min |          | 2.5-18% B2 over 65 min,<br>18%-35% B2 over 40 min,<br>35%-99% B2 over 5 min,<br>99% B2 over 20 min |          |
| <b>Separation column</b>                         | Acclaim PepMap C18, 75 $\mu\text{m}$ x 50 cm, 2 $\mu\text{m}$ particle size, 100 $\text{\AA}$ pore size; Thermo Scientific                                                                                            |          |                       |          |                                                                                                    |          |                                                                                                    |          |
| <b>Resolution at <math>m/z</math> 200 (FWHM)</b> | 70,000                                                                                                                                                                                                                |          |                       |          |                                                                                                    |          |                                                                                                    |          |
| <b>Chromatographic peak width</b>                | 30 s                                                                                                                                                                                                                  |          |                       |          | 20 s                                                                                               | 30 s     | 20 s                                                                                               | 30s      |
| <b>AGC target</b>                                | 1e6                                                                                                                                                                                                                   |          |                       |          |                                                                                                    |          |                                                                                                    |          |
| <b>Maximum injection time</b>                    | 50 ms                                                                                                                                                                                                                 | 100 ms   | 50 ms                 | 30 ms    | 50 ms                                                                                              | 50 ms    | 100 ms                                                                                             |          |
| <b>Scan range</b>                                | 375-1600 $m/z$                                                                                                                                                                                                        |          |                       |          | 350-1600 $m/z$                                                                                     |          | 350-1500 $m/z$                                                                                     |          |
| <b>TopN</b>                                      | 12                                                                                                                                                                                                                    |          |                       |          |                                                                                                    |          |                                                                                                    |          |
| <b>Resolution at <math>m/z</math> 200 (FWHM)</b> | 17,500                                                                                                                                                                                                                |          |                       |          |                                                                                                    |          |                                                                                                    |          |
| <b>Isolation window</b>                          | 1.5 $m/z$                                                                                                                                                                                                             |          |                       |          |                                                                                                    |          |                                                                                                    |          |
| <b>AGC target</b>                                | 5e4                                                                                                                                                                                                                   |          | 1e5                   | 5e4      |                                                                                                    |          |                                                                                                    |          |
| <b>Maximum injection time</b>                    | 55 ms                                                                                                                                                                                                                 | 125 ms   | 55 ms                 | 55 ms    | 110 ms                                                                                             | 55 ms    | 125 ms                                                                                             |          |
| <b>Normalized collision energy (NCE)</b>         | 27                                                                                                                                                                                                                    |          |                       |          |                                                                                                    |          |                                                                                                    |          |
| <b>Minimum AGC target</b>                        | 2e2                                                                                                                                                                                                                   | 1.25e3   | 5e2                   | 5.5e2    | 1e3                                                                                                | 5.5e2    | 1.25e3                                                                                             |          |
| <b>Intensity threshold</b>                       | 3.6e3                                                                                                                                                                                                                 | 1e4      | 9.1e3                 | 1e4      | 9.1e3                                                                                              | 1e4      |                                                                                                    |          |
| <b>Charge exclusion</b>                          | unassigned,1, >7                                                                                                                                                                                                      |          |                       |          | unassigned,1, >4                                                                                   |          | unassigned,1, >5                                                                                   |          |
| <b>Dynamic exclusion</b>                         | 60 s                                                                                                                                                                                                                  |          |                       |          | auto                                                                                               |          | auto                                                                                               | 30 s     |

LC parameters

MS1 settings

MS2 settings
