# Supplementary material for: Light‐dependent N‐terminal phosphorylation of LHCSR3 and LHCB4 are interlinked in Chlamydomonas reinhardtii
Source: PubMed Central journal article supplement (PMC6851877; doi:10.1111/tpj.14368), 2019-05-30
Supplement: TPJ-99-877-s011.pdf [file TPJ-99-877-s011.pdf]

# Table S3

**Table S3.** LC-MS/MS parameters for PRM analyses. \*, Single Ion Monitoring (SIM) data was acquired in parallel to PRM data, but was excluded from further analyses.

|                                                       | LHCSR3 phosphosite mutants*                                                                                                                                                                                           |                                                                                                                            | High light kinetics                                                                                                        |                                                                                                                            |
|-------------------------------------------------------|-----------------------------------------------------------------------------------------------------------------------------------------------------------------------------------------------------------------------|----------------------------------------------------------------------------------------------------------------------------|----------------------------------------------------------------------------------------------------------------------------|----------------------------------------------------------------------------------------------------------------------------|
|                                                       | Trypsin digested samples                                                                                                                                                                                              | LysC digested samples                                                                                                      | 200 $\mu\text{mol photons m}^{-2} \text{s}^{-1}$                                                                           | 500 $\mu\text{mol photons m}^{-2} \text{s}^{-1}$                                                                           |
| <b>Eluent compositions</b>                            | Peptide trapping: 0.05% trifluoroacetic acid (TFA) in ultrapure water (A1), 0.05% TFA in 80% acetonitrile (B1)<br>Peptide separation: 0.1% formic acid (FA) in ultrapure water (A2), 0.1% FA in 80% acetonitrile (B2) |                                                                                                                            |                                                                                                                            |                                                                                                                            |
| <b>Trap Column</b>                                    | C18 PepMap 100, 300 $\mu\text{m}$ x 5 mm, 5 $\mu\text{m}$ particle size, 100 $\text{\AA}$ pore size; Thermo Scientific                                                                                                |                                                                                                                            |                                                                                                                            |                                                                                                                            |
| <b>Peptide trapping (eluent A1+B1)</b>                | 2.5% B1 at 10 $\mu\text{l/min}$ for 10 min                                                                                                                                                                            |                                                                                                                            | 2.5% B1 at 10 $\mu\text{l/min}$ for 5 min                                                                                  |                                                                                                                            |
| <b>Separation Column</b>                              | Acclaim PepMap C18, 75 $\mu\text{m}$ x 50 cm, 2 $\mu\text{m}$ particle size, 100 $\text{\AA}$ pore size; Thermo Scientific                                                                                            | Acclaim PepMap C18, 75 $\mu\text{m}$ x 15 cm, 2 $\mu\text{m}$ particle size, 100 $\text{\AA}$ pore size; Thermo Scientific | Acclaim PepMap C18, 75 $\mu\text{m}$ x 50 cm, 2 $\mu\text{m}$ particle size, 100 $\text{\AA}$ pore size; Thermo Scientific | Acclaim PepMap C18, 75 $\mu\text{m}$ x 50 cm, 2 $\mu\text{m}$ particle size, 100 $\text{\AA}$ pore size; Thermo Scientific |
| <b>Gradient for peptide separation (eluent A2+B2)</b> | 2.5-30% B2 over 240 min,<br>30-50% B2 over 60 min,<br>50%-99% B2 over 5 min<br>99% B2 over 15 min                                                                                                                     | 2.5-15% B2 over 47 min,<br>15%-34% B2 over 33 min,<br>34%-99% B2 over 5 min,<br>99% B over 5 min                           | 2.5-18% B2 over 65 min,<br>18%-35% B2 over 40 min,<br>35%-99% B2 over 5 min,<br>99% B2 over 20 min                         | 2.5-18% B2 over 65 min,<br>18%-35% B2 over 40 min,<br>35%-99% B2 over 5 min,<br>99% B2 over 20 min                         |
| <b>Flow rate</b>                                      | 300 nl/min                                                                                                                                                                                                            |                                                                                                                            |                                                                                                                            |                                                                                                                            |
| <b>Chromatographic peak width</b>                     | 15 s                                                                                                                                                                                                                  |                                                                                                                            |                                                                                                                            |                                                                                                                            |
| <b>Resolution (FWHM) at m/z 200</b>                   | 70,000                                                                                                                                                                                                                | 35,000                                                                                                                     | 35,000                                                                                                                     |                                                                                                                            |
| <b>AGC target</b>                                     | 1e5                                                                                                                                                                                                                   |                                                                                                                            | 5e4                                                                                                                        |                                                                                                                            |
| <b>Maximum injection time</b>                         | 480 ms                                                                                                                                                                                                                | 240 ms                                                                                                                     | 240 ms                                                                                                                     |                                                                                                                            |
| <b>Isolation window</b>                               | 2 m/z                                                                                                                                                                                                                 | 3 m/z                                                                                                                      | 2 m/z                                                                                                                      |                                                                                                                            |
| <b>Isolation offset</b>                               | 0 m/z                                                                                                                                                                                                                 | 1 m/z                                                                                                                      | 0.5 m/z                                                                                                                    |                                                                                                                            |
| <b>Normalized collision energy (NCE)</b>              | 27                                                                                                                                                                                                                    |                                                                                                                            |                                                                                                                            |                                                                                                                            |

LC parameters

MS settings (PRM)
